# Supplementary material
Source: publisher figshare collection journal article supplement (https://rs.figshare.com/ndownloader/files/17609105)
Supplement: Supplementary file 1 [file 17609105]

**Supplementary information**

**Sperm cryopreservation reduces offspring growth**

David Nusbaumer, Lucas Marques da Cunha, Claus Wedekind*

Department of Ecology & Evolution, University of Lausanne, Lausanne, Switzerland

*correspondence: Claus Wedekind, [claus.wedekind@unil.ch](mailto:claus.wedekind@unil.ch), orcid.org/0000-0001-6143-4716

**Content**

*Supplementary Table:*

Table S1: Family and treatment effects on (A) larval mortality, (B) the cumulative mortality, and (C) yolk consumption

*Supplementary Figures:*

Figure S1: Experimental design. (A) Schematic representation of a breeding block, and (B) illustration of how the eggs were distributed to the 24-well plates for incubation.

Figure S2: Alarva photographed on (A) its hatching day and (B) fourteen days later.

Figure S3: The effects of male (sire) identity on embryo growth.

Figure S4: The effects of cryopreservation and pathogen exposure on (A) embryo mortality, (B) larval mortality, (C) cumulative mortality, and (D) hatching time.

Figure S5: The effect of cryopreservation and pathogen exposure on (A) yolk sack volume at hatching and (B) yolk consumption during 14 days.

Figure S6: Effect of length at hatching on larval growth during 14 days for each male.

Figure S7: Effect of larval growth during 14 days on yolk consumption.

**Table S1**. Likelihood ratio tests comparing linear mixed-effects models on (A) larval mortality, (B) the cumulative mortality (i.e. embryo plus larval mortality), and (C) yolk consumption. Models including or lacking the term of interest were compared to the reference model in bold to determine the significance of the effect tested (in (C), growth was also entered as a fixed effect in the reference model). Significant p-values are emphasised in bold letters.

| Model terms | Effect tested | AIC | d.f. | 2 | *P* |
| --- | --- | --- | --- | --- | --- |
| 1. *Larval mortality* | |  |  |  |  |
| p+c+m+b |  | 458 | 5 |  |  |
| p+c+b | b | 479 | 4 | 22.8 | **<0.001** |
| p+c+b | m | 458 | 4 | 1 | 0.31 |
| p+c+m+b | c | 457 | 4 | 0.5 | 0.48 |
| c+m+b | p | 466 | 4 | 9.2 | **0.002** |
| p+c+m+c|f | c x b | 462 | 7 | 0.3 | 0.88 |
| p+c+m+p|b | p x b | 462 | 7 | 0.3 | 0.86 |
| p+c+c|m+t | c x m | 461 | 7 | 1 | 0.59 |
| p+c+p|m+b | p x m | 462 | 7 | 0.5 | 0.79 |
| p+c+p:c+m+b | p x c | 460 | 6 | 0 | 0.83 |
| 1. *Cumulative mortality* | |  |  |  |  |
| p+c+m+b |  | 974 | 5 |  |  |
| p+c+b | b | 992 | 4 | 19.1 | **<0.001** |
| p+c+b | m | 975 | 4 | 2.1 | 0.15 |
| p+m+b | c | 973 | 4 | 0.6 | 0.45 |
| c+m+b | p | 1005 | 4 | 33 | **<0.001** |
| p+c+m+c|b | c x b | 978 | 7 | 0.2 | 0.91 |
| p+c+m+p|b | p x b | 945 | 7 | 33.4 | **<0.001** |
| p+c+c|m+b | c x m | 978 | 7 | 0 | 0.99 |
| p+c+p|m+f | p x m | 967 | 7 | 11.2 | **0.004** |
| p+c+p:c+m+b | p x c | 976 | 7 | 0.3 | 0.60 |
| 1. *Yolk consumption* | |  |  |  |  |
| g+p+c+m+b |  | 3432 | 7 |  |  |
| g+p+c+m | b | 3438 | 6 | 8.4 | **0.004** |
| g+p+c+b | m | 3431 | 6 | 1.3 | 0.25 |
| g+p+m+b | c | 3431 | 6 | 0.9 | 0.33 |
| g+c+m+b | p | 3432 | 6 | 2 | 0.16 |
| p+c+m+b | g | 3440 | 6 | 10.6 | **0.001** |
| g+p+c+m+t|b | p x b | 3433 | 9 | 2.1 | 0.34 |
| g+p+c+m+c|b | c x b | 3435 | 9 | 0.5 | 0.80 |
| g+p+c+m+g|b | g x b | 3423 | 9 | 12.7 | **0.002** |
| g+p+c+p|m+b | p x m | 3433 | 9 | 2.7 | 0.25 |
| g+p+c+c|m+b | c x m | 3435 | 9 | 0.3 | 0.86 |
| g+p+c+g|m+b | g x m | 3412 | 9 | 23.1 | **<0.001** |
| g+p+c+t:c+m+b | p x c | 3432 | 8 | 1.2 | 0.27 |
| g+p+c+g:p+m+b | g x p | 3429 | 8 | 4.5 | **0.03** |
| g+p+c+g:c+m+b | g x c | 3433 | 8 | 0.5 | 0.49 |

Fixed effects: p, pathogen treatment; c, cryopreservation; g, growth; Random effects: m, male; b, breeding block

**Figure S1.** Experimental design. (A) Schematic representation of a breeding block (1 female crossed with 4 males) and the treatments applied to the sperm (NC: non-cryopreserved; C: cryopreserved) and to the fertilized eggs (sham exposed vs. pathogen exposed). (B) Illustration of how the eggs of a breeding blocks were distributed to the 24-well plates for incubation. The 96 fertilized eggs were distributed to 4 24-well plates, such that each sire was equally represented per plate (one row per sire), and half of the embryos per plate had been fertilized by cryopreserved sperm (i.e., the first three columns of eggs), the other half by non-cryopreserved sperm. All embryos of 2 plates each were exposed to the pathogen, the remaining embryos were sham-exposed. This design was replicated for all breeding blocks.

In two of the 40 experimental families, one and two eggs were accidentally lost during the handling. We therefore incubated one additional egg each of three other families to avoid empty wells in the 24-well plates.

**A)**

**B)**

**Figure S2.** Alarva photographed on (A) its hatching day and (B) fourteen days later. Body length and yolk sac volume at hatching could only be determined for 604 and 639, respectively, of in total 751 larvae that had hatched, because the hatching date was in some cases accidentally missed, some larvae were lost during handling, or because of low photo quality due to the position of the larvae within the well. At day 14, the number of hatchlings whose body length and yolk sac volume could be determined were 547 and 555, respectively. The missing values were due to low photo quality or mortality between hatching and day 14. Apart from larval mortality (see Table S1), these missing data were about equally spread over treatments and males (likelihood ratio tests comparing generalized linear mixed-effects models that are analogous to Table S1, testing the effects of cryopreservation (2 = 3.1), pathogen treatment (2 = 3.1), and male (2 = 0.01) on missing values not due to larval mortality: p always > 0.05).

**Figure S3.** The effects of male (sire) identity on embryo growth, balanced for treatments per paternal sib group (i.e. means of the means of the four experimental cells each). The figure shows the mean larval length at hatching per paternal sib group as predicted by the mean time of hatching per paternal sib group (regression line; n = 40, r = -0.33, p = 0.04).

**
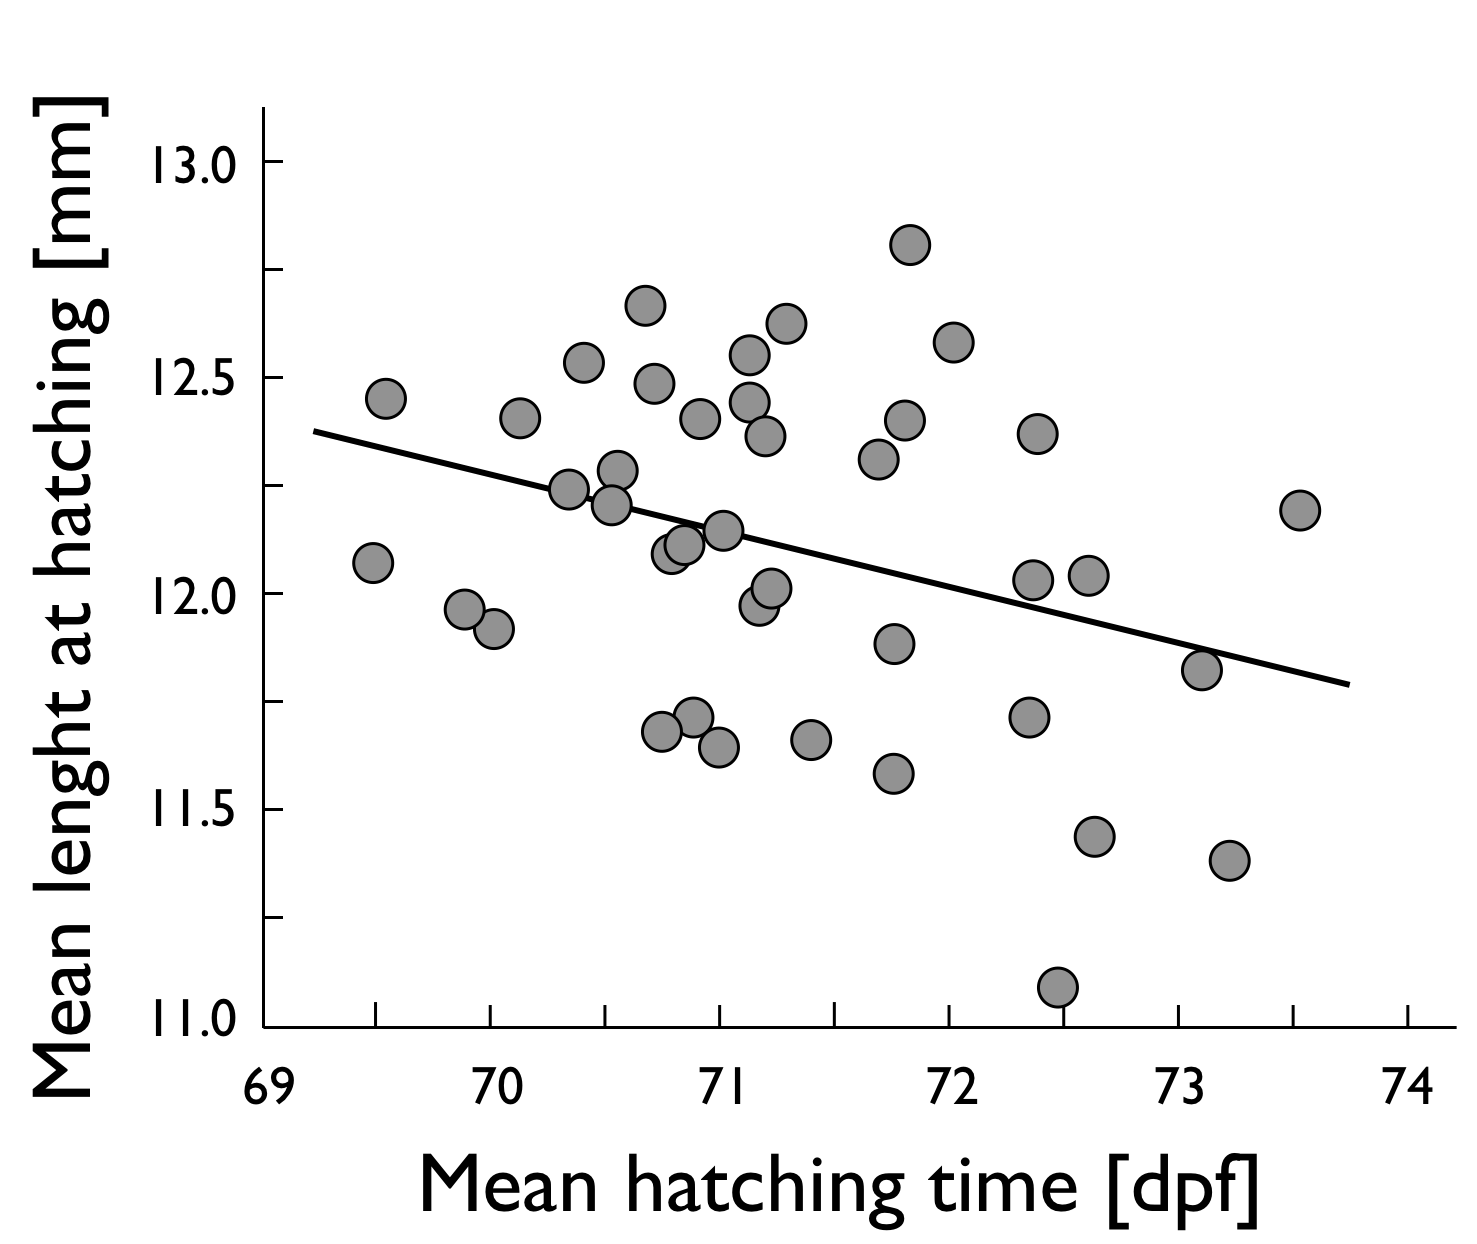
**

**Figure S4.** The effects of cryopreservation and pathogen exposure on (A) embryo mortality, (B) larval mortality, (C) cumulative embryo and larval mortality, and (D) hatching time. Empty and filled symbols represent embryos produced with non-cryopreserved sperm or cryopreserved sperm, respectively. The panels show means and 95 % confidence intervals (based on family means). Asterisks indicate the levels of significance (****p*<0.001, **p* <0.05), and ns means not significant. See Tables 1 and S1 for the statistics.

**Figure S5.** The effect of cryopreservation and pathogen exposure on (A) yolk sack volume at hatching and (B) yolk consumption during 14 days. Empty and filled symbols represent embryos produced with non-cryopreserved sperm or cryopreserved sperm, respectively. The panels show means and 95 % confidence intervals (based on family means). See Table 2 and S1 for statistics (“ns” means not significant).

**Figure S6.** Effect of length at hatching on larval growth during 14 days for each male, illustrated by each grey line. Slopes are based on the linear mixed effect model coefficients. See Table 2 for statistics.

**Figure S7** Effect of larval growth during 14 days on yolk consumption during the same time. The black bold line shows the main effect of growth on yolk consumption, each dashed black line shows the same effect within each block and each grey line shows the same effect for each experimental male. Colored lines show the effect of growth on yolk consumption when larvae were exposed to the pathogen (red) or sham-treated (blue). Slopes are based on the linear mixed effect model coefficients. See table S1 for statistics.
